# Supplementary material for: A pathological complete response to neoadjuvant chemotherapy and immunotherapy in a non-small cell lung cancer patient
Source: PubMed Central journal article supplement — Transl Lung Cancer Res. 2020 Oct;9(5):2157–60. doi: 10.21037/tlcr-20-770 (PMC7653127; doi:10.21037/tlcr-20-770), 2020-10
Supplement: tlcr-09-05-2157-rc.pdf [file tlcr-09-05-2157-rc.pdf]

| Topic                       | Item No | Checklist item description                                                                             | Reported on Page Number/Line Number | Reported on Section/Paragraph |
|-----------------------------|---------|--------------------------------------------------------------------------------------------------------|-------------------------------------|-------------------------------|
| Title                       | 1       | The diagnosis or intervention of primary focus followed by the words “case report”                     | page1/line 1-4                      | Title                         |
| Key Words                   | 2       | 2 to 5 key words that identify diagnoses or interventions in this case report, including "case report" | page2/line 8-9                      | Key word                      |
| Abstract<br>(no references) | 3a      | Introduction: What is unique about this case and what does it add to the scientific literature?        | page2/line 3-6                      | Abstract                      |
|                             | 3b      | Main symptoms and/or important clinical findings                                                       | page1/line 31-33                    | Abstract                      |
|                             | 3c      | The main diagnoses, therapeutic interventions, and outcomes                                            | page2/line 1-3                      | Abstract                      |
|                             | 3d      | Conclusion—What is the main “take-away” lesson(s) from this case?                                      | page2/line 3-6                      | Abstract                      |
| Introduction                | 4       | One or two paragraphs summarizing why this case is unique ( <b>may include references</b> )            | page2/line 31-33                    | Introduction                  |
| Patient Information         | 5a      | De-identified patient specific information                                                             | page3/line 2-4                      | Case presentation             |
|                             | 5b      | Primary concerns and symptoms of the patient                                                           | page3/line 4-5                      | Case presentation             |
|                             | 5c      | Medical, family, and psycho-social history including relevant genetic information                      | page3/line 4-5                      | Case presentation             |
|                             | 5d      | Relevant past interventions with outcomes                                                              | page3/line 9                        | Case presentation             |
| Clinical Findings           | 6       | Describe significant physical examination (PE) and important clinical findings                         | page3/line 9-14                     | Case presentation             |
| Timeline                    | 7       | Historical and current information from this episode of care organized as a timeline                   | page3/line 18-21                    | Case presentation             |
| Diagnostic Assessment       | 8a      | Diagnostic testing (such as PE, laboratory testing, imaging, surveys).                                 | page3/line 6-8                      | Case presentation             |
|                             | 8b      | Diagnostic challenges (such as access to testing, financial, or cultural)                              | page3/line 9-13                     | Case presentation             |
|                             | 8c      | Diagnosis (including other diagnoses considered)                                                       | page3/line 14-15                    | Case presentation             |
|                             | 8d      | Prognosis (such as staging in oncology) where applicable                                               | page3/line 14-15                    | Case presentation             |
| Therapeutic Intervention    | 9a      | Types of therapeutic intervention (such as pharmacologic, surgical, preventive, self-care)             | page3/line 16-18 21-23              | Case presentation             |
|                             | 9b      | Administration of therapeutic intervention (such as dosage, strength, duration)                        | page3/line 16-18 21-23              | Case presentation             |
|                             | 9c      | Changes in therapeutic intervention (with rationale)                                                   | page3/line 18-21                    | Case presentation             |

|                        |     |                                                                                                        |                                      |                          |
|------------------------|-----|--------------------------------------------------------------------------------------------------------|--------------------------------------|--------------------------|
| Follow-up and Outcomes | 10a | Clinician and patient-assessed outcomes (if available)                                                 | page3/line 23-27                     | Case presentation        |
|                        | 10b | Important follow-up diagnostic and other test results                                                  | page3/line 26                        | Case presentation        |
|                        | 10c | Intervention adherence and tolerability (How was this assessed?)                                       | page3/line 16-18                     | Case presentation        |
|                        | 10d | Adverse and unanticipated events                                                                       | page3/line 27                        | Case presentation        |
| Discussion             | 11a | A scientific discussion of the strengths AND limitations associated with this case report              | page4/line 22-25                     | Discussion               |
|                        | 11b | Discussion of the relevant medical literature <b>with references</b>                                   | page4/line 11-18                     | Discussion               |
|                        | 11c | The scientific rationale for any conclusions (including assessment of possible causes)                 | page4/line 11-14                     | Discussion               |
|                        | 11d | The primary “take-away” lessons of this case report (without references) in a one paragraph conclusion | page4/line 25-27                     | Discussion               |
| Patient Perspective    | 12  | The patient should share their perspective in one to two paragraphs on the treatment(s) they received  | page3/line 27-29                     | Case presentation        |
| Informed Consent       | 13  | Did the patient give informed consent? Please provide if requested                                     | Yes <input checked="" type="radio"/> | No <input type="radio"/> |

Article Information: <http://dx.doi.org/10.21037/tlcr-20-770>

\*As the checklist was provided upon initial submission, the page number/line number reported may be changed due to copyediting and may not be referable in the published version. In this case, the section/paragraph may be used as an alternative reference.
